# Supplementary material for: Consumption of Ultra-Processed Foods Is Inversely Associated with Adherence to the Mediterranean Diet: A Cross-Sectional Study
Source: MDPI journal article supplement (doi:10.3390/nu14102073), 2022-05-15
Supplement: s1 [file s1]

**Supplementary Table S1.** Contribution (%) of individual foods to the total intake of UPF

|                                                                           | All (n=670) | Women (n=472) | Men (n=198) | p-value |
|---------------------------------------------------------------------------|-------------|---------------|-------------|---------|
| <b>Vegetables and legumes UPF</b>                                         | 10.6 ± 16.2 | 9.8 ± 10      | 12.4 ± 18   | 0.104   |
| Ready-to-heat vegetables and legumes (with added ingredients)             | 10.6 ± 16.2 | 9.8 ± 10      | 12.4 ± 18   | 0.104   |
| <b>Cereals and tubers UPF</b>                                             | 24.5 ± 17.7 | 24.7 ± 17.7   | 23.9 ± 18   | 0.513   |
| Ready-to-heat pasta/gnocchi dishes                                        | 3.1 ± 5.9   | 3.4 ± 6.3     | 2.4 ± 5     | 0.005   |
| Pre-packaged breads, buns, and bread alternatives                         | 9.3 ± 11.9  | 9.3 ± 11.3    | 9.5 ± 13.2  | 0.315   |
| Pre-packaged pizza, focaccia, sandwich, and savory pies                   | 5.2 ± 8.7   | 5.1 ± 8.4     | 5.6 ± 9.2   | 0.331   |
| Pre-packaged instant rice, soups, noodles                                 | 1.1 ± 3.2   | 1.1 ± 2.9     | 1.2 ± 3.7   | 0.846   |
| Breakfast cereals and energy bars (with added sugar)                      | 2.4 ± 5.5   | 2.5 ± 5.2     | 2.1 ± 6.1   | 0.067   |
| Pre-packaged potatoes (e.g., frozen potato chips)                         | 3.3 ± 5.1   | 3.3 ± 5.2     | 3.2 ± 4.7   | 0.993   |
| <b>Meat and fish UPF</b>                                                  | 5.8 ± 7     | 5.3 ± 6.7     | 6.8 ± 7.4   | 0.005   |
| Nuggets, sticks, sausages, burgers, and other reconstituted meat products | 5.0 ± 6.5   | 4.6 ± 6.4     | 5.7 ± 6.6   | 0.009   |
| Fish nuggets, fish sticks, and other reconstituted fish products          | 0.8 ± 2     | 0.7 ± 1.7     | 1.1 ± 2.6   | 0.045   |
| <b>Milk and dairy products UPF</b>                                        | 12.0 ± 17   | 12.6 ± 18     | 10.6 ± 14.2 | 0.326   |
| Milk beverages (e.g., probiotic milk with added sugar)                    | 3.4 ± 10.6  | 3.9 ± 12      | 2.1 ± 5.9   | 0.362   |
| Fruit or flavored yogurts (e.g., vanilla flavored)                        | 7.9 ± 13.4  | 7.9 ± 13.6    | 7.8 ± 13    | 0.750   |
| Melted cheese (also used to stuff sandwich)                               | 0.7 ± 1.6   | 0.7 ± 1.6     | 0.7 ± 1.6   | 0.459   |
| <b>Fats and seasonings UPF</b>                                            | 2.5 ± 3.6   | 2.3 ± 3.3     | 2.9 ± 4.2   | 0.077   |
| Margarines and other spreads                                              | 0.1 ± 0.3   | 0.1 ± 0.3     | 0.1 ± 0.3   | 0.330   |
| Pre-packaged or instant sauces (e.g., mayonnaise, ketchup, meat sauce)    | 2.4 ± 3.6   | 2.3 ± 3.2     | 2.9 ± 4.2   | 0.063   |
| <b>Sweets and Sweeteners UPF</b>                                          | 20.7 ± 16   | 21.0 ± 16.5   | 20.1 ± 14.8 | 0.985   |
| Pre-packaged biscuits, cakes, snacks, and ice-cream                       | 14.7 ± 13.5 | 14.8 ± 14.1   | 14.6 ± 12   | 0.547   |
| Chocolate, spreads (e.g., nut spread), and candies                        | 6.0 ± 8.2   | 6.2 ± 8.3     | 5.6 ± 8.0   | 0.309   |
| <b>Beverages UPF</b>                                                      | 15.8 ± 18.3 | 15.5 ± 18.6   | 16.5 ± 17.7 | 0.125   |
| Soft and energy drinks (e.g., iced tea, coke)                             | 14.2 ± 18.1 | 14.1 ± 18.3   | 14.7 ± 17.6 | 0.343   |
| Alcoholic beverages (e.g., rum, gin, spirits)                             | 1.6 ± 4.2   | 1.4 ± 4       | 1.9 ± 4.4   | 0.001   |
| <b>Other UPF</b>                                                          | 8.0 ± 10.7  | 8.6 ± 17.6    | 6.6 ± 15.6  | 0.051   |
| Plant-based dairy substitutes (e.g., soy yogurt, tofu)                    | 6.5 ± 16    | 7.0 ± 16.5    | 5.5 ± 14.7  | 0.124   |
| Plant-based meat substitutes (e.g., veggie burger)                        | 1.5 ± 4.4   | 1.6 ± 4.6     | 1.2 ± 3.7   | 0.119   |

Data are reported as mean  $\pm$  standard deviation
